# Supplementary material
Source: ML conference proceedings conference paper supplement (https://proceedings.neurips.cc/paper_files/paper/2012/hash/a684eceee76fc522773286a895bc8436-Abstract.html)
Supplement: Supplementary file [file a684eceee76fc522773286a895bc8436-Supplemental.zip]

---

# Supplementary Material: Local Supervised Learning

---

**Joseph Wang**

Dept. of Electrical and Computer Engineering  
Boston University  
Boston, MA 02116  
joewang@bu.edu

**Venkatesh Saligrama**

Dept. of Electrical and Computer Engineering  
Boston University  
Boston, MA 02116  
srv@bu.edu

## 1 Proof of Lemma 2.2

The global loss surrogate is given by:

$$\hat{R}(g, f_0, f_1) = \frac{1}{n} \sum_{i=1}^n \phi(g(x_i)) \phi(y_i f_0(x_i)) + \frac{1}{n} \sum_{i=1}^n \phi(-g(x_i)) \phi(y_i f_1(x_i)). \quad (1)$$

The data can be viewed as training data of twice the size. Each point is represented twice, once with label 1 and weight  $\phi(y_i f_0(x_i))$  and once with label  $-1$  with weight  $\phi(y_i f_1(x_i))$ .

Note that if the loss of both  $f_0$  and  $f_1$  is the same for both classifiers, the point does not effect the learning of the partitioning classifier. Otherwise, even if both  $f_0$  and  $f_1$  produce the same sign for the output, the partitioning classifier will attempt to place the observation in the region with the largest positive margin.

## 2 Proof of Theorem 2.4

The local linear classifier,  $F$ , is composed of the rejection classifiers,  $g_1, g_2, \dots, g_{r-1}$ , and the region classifiers,  $f_1, f_2, \dots, f_r$ . As the output  $F$  can be expressed as a boolean function of  $2r - 1$  linear functions, each with a VC-dimension of  $d + 1$ , from Lemma 2 of [1], the VC-dimension of the local linear classifier can be bounded:

$$VC(F) \leq 2(2r - 1) \log(e(2r - 1))(d + 1). \quad (2)$$

## 3 Proof of Theorem 2.5

Consider the 4 clusters of points,  $C_1, C_2, C_3$ , and  $C_4$ , located at  $(1, 0)$ ,  $(0, 1)$ ,  $(-1, 0)$ , and  $(0, -1)$ , each with an identical number of points ( $|C_1| = |C_2| = |C_3| = |C_4|$ ). For the XOR, without loss of generality, let the points in cluster  $C_1$  and  $C_3$  have a label of  $-1$ , and the points in the other cluster have a label of 1. Consider the initial random sampling of the reject region,  $r_i$ , and define the rejected set in each cluster as  $R_1, R_2, R_3$ , and  $R_4$ , where  $|R_j| = \sum_{i \in C_j} \mathbb{1}_{r_i=1}$ . Suppose we sample equally from each label, such that  $|R_1| + |R_3| = |R_2| + |R_4|$ . Then with high probability one of the two clusters for each label will have more points. Without loss of generality, assume  $C_3$  has a larger rejected set than the other clusters, i.e.  $|R_3| > |R_1|$ ,  $|R_3| > |R_2|$ , and  $|R_3| > |R_4|$ , and therefore  $C_1$  has a smaller rejected set than all other clusters. The class prior probabilities can be expressed:

$$\pi_{-1} = \pi_1 = \frac{1}{2}.$$

The mean of the points labeled  $-1$  that are not rejected can be expressed:

$$[\mu_{-1}, 0] = \left[ \frac{|R_3| - |R_1|}{|C_1| + |C_3| - |R_1| - |R_3|}, 0 \right]^T.$$

Given that more points are rejected from cluster  $C_3$ ,  $\mu_{-1} > 0$ . Similarly, the mean of the points labeled 1 that are reject can be written:

$$[0, \mu_1] = \left[ 0, \frac{|R_4| - |R_2|}{|C_2| + |C_4| - |R_2| - |R_4|} \right]^T.$$

Given that  $|R_3| > |R_2|$ ,  $|R_3| > |R_1|$ ,  $|R_1| < |R_2|$ , and  $|R_1| < |R_4|$ ,  $\mu_{-1} > |\mu_1|$ . Additionally, the covariance can be expressed:

$$\Sigma = \begin{bmatrix} \frac{1-\mu_{-1}^2}{2} & 0 \\ 0 & \frac{1-\mu_1^2}{2} \end{bmatrix}.$$

Points in cluster  $C_3$  have linear discriminant functions:

$$\delta_{-1} = \frac{\mu_{-1}}{(\mu_{-1} - 1)},$$

and

$$\delta_1 = \frac{\mu_1^2}{(\mu_1^2 - 1)}.$$

$C_3$  will be classified incorrectly if the following inequality holds:

$$\delta_{-1} < \delta_1.$$

This inequality can be rewritten:

$$\begin{aligned} \frac{\mu_{-1}}{\mu_{-1} - 1} &< \frac{\mu_1^2}{\mu_1^2 - 1} \\ \mu_{-1} (\mu_1^2 - 1) &< \mu_1^2 (\mu_{-1} - 1) \\ \mu_1^2 &< \mu_{-1}, \end{aligned}$$

As  $-1 \leq \mu_1 \leq 1$ ,  $0 < \mu_{-1} < 1$ , and  $\mu_{-1} > |\mu_1|$ , the above inequality must hold, and therefore the points in cluster  $C_3$  will be classified incorrectly. Similarly, for the points in  $C_1$ , the discriminant functions can be expressed:

$$\delta_{-1} = \frac{\mu_{-1}}{(1 + \mu_{-1})},$$

and

$$\delta_1 = \frac{-\mu_1^2}{(1 - \mu_1^2)}.$$

$C_1$  will be classified correctly if:

$$\delta_{-1} > \delta_1.$$

This is equivalent to:

$$\frac{\mu_{-1}}{(1 + \mu_{-1})} > \frac{-\mu_1^2}{(1 - \mu_1^2)},$$

which must hold, as  $-1 \leq \mu_1 \leq 1$  and  $0 < \mu_{-1} < 1$ .

For the rejected points, the points in  $C_1$  will be classified incorrectly and the points in  $C_3$  will be classified correctly by  $f_1$ . Therefore,  $C_1$  and  $C_3$  will have different rejection labels and will be partitioned into region 0 and 1, respectively. Given these clusters are in separate regions, the data in each region is linearly separable regardless of the partitioning of  $C_2$  and  $C_4$  and will be classified correctly.

Therefore if we reject data points equally with respect to labels, local linear classification using LDA will only fail to converge to the correct answer if  $|R_1| = |R_2| = |R_3| = |R_4|$ .

## References

- [1] Eduardo D. Sontag. Vc dimension of neural networks. In *Neural Networks and Machine Learning*, pages 69–95. Springer, 1998.
